# Supplementary material for: Secretion of fibronectin by human pancreatic stellate cells promotes chemoresistance to gemcitabine in pancreatic cancer cells
Source: Springer Nature journal article supplement (doi:10.1186/s12885-019-5803-1), 2019-06-17
Supplement: MOESM7 [file 16819858]

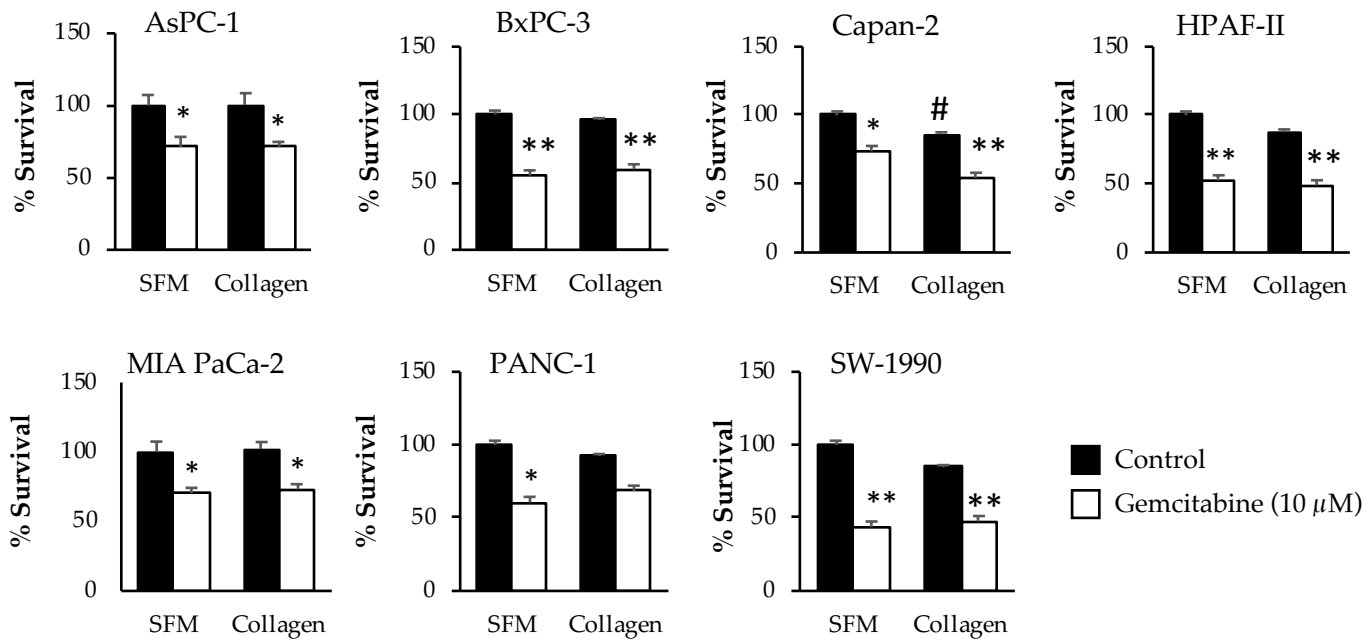

**Additional File 7\_Figure S4. Effect of collagen on gemcitabine sensitivity.** PCCs seeded on 96-well plates with- or without collagen-coating as indicated. Cells were incubated with SFM for 24 hours prior to incubation with gemcitabine (10 μM) for 48 hours. Cell viability was determined using the MTT assay. Data are the mean ± SEM of triplicate determinations. \*p<0.05, \*\*p<0.01 for control vs gemcitabine; #p<0.05, for SFM vs collagen in control and gemcitabine groups. SFM, serum-free DMEM.
