# Supplementary material for: Secretion of fibronectin by human pancreatic stellate cells promotes chemoresistance to gemcitabine in pancreatic cancer cells
Source: Springer Nature journal article supplement (doi:10.1186/s12885-019-5803-1), 2019-06-17
Supplement: MOESM8 [file 16819858]

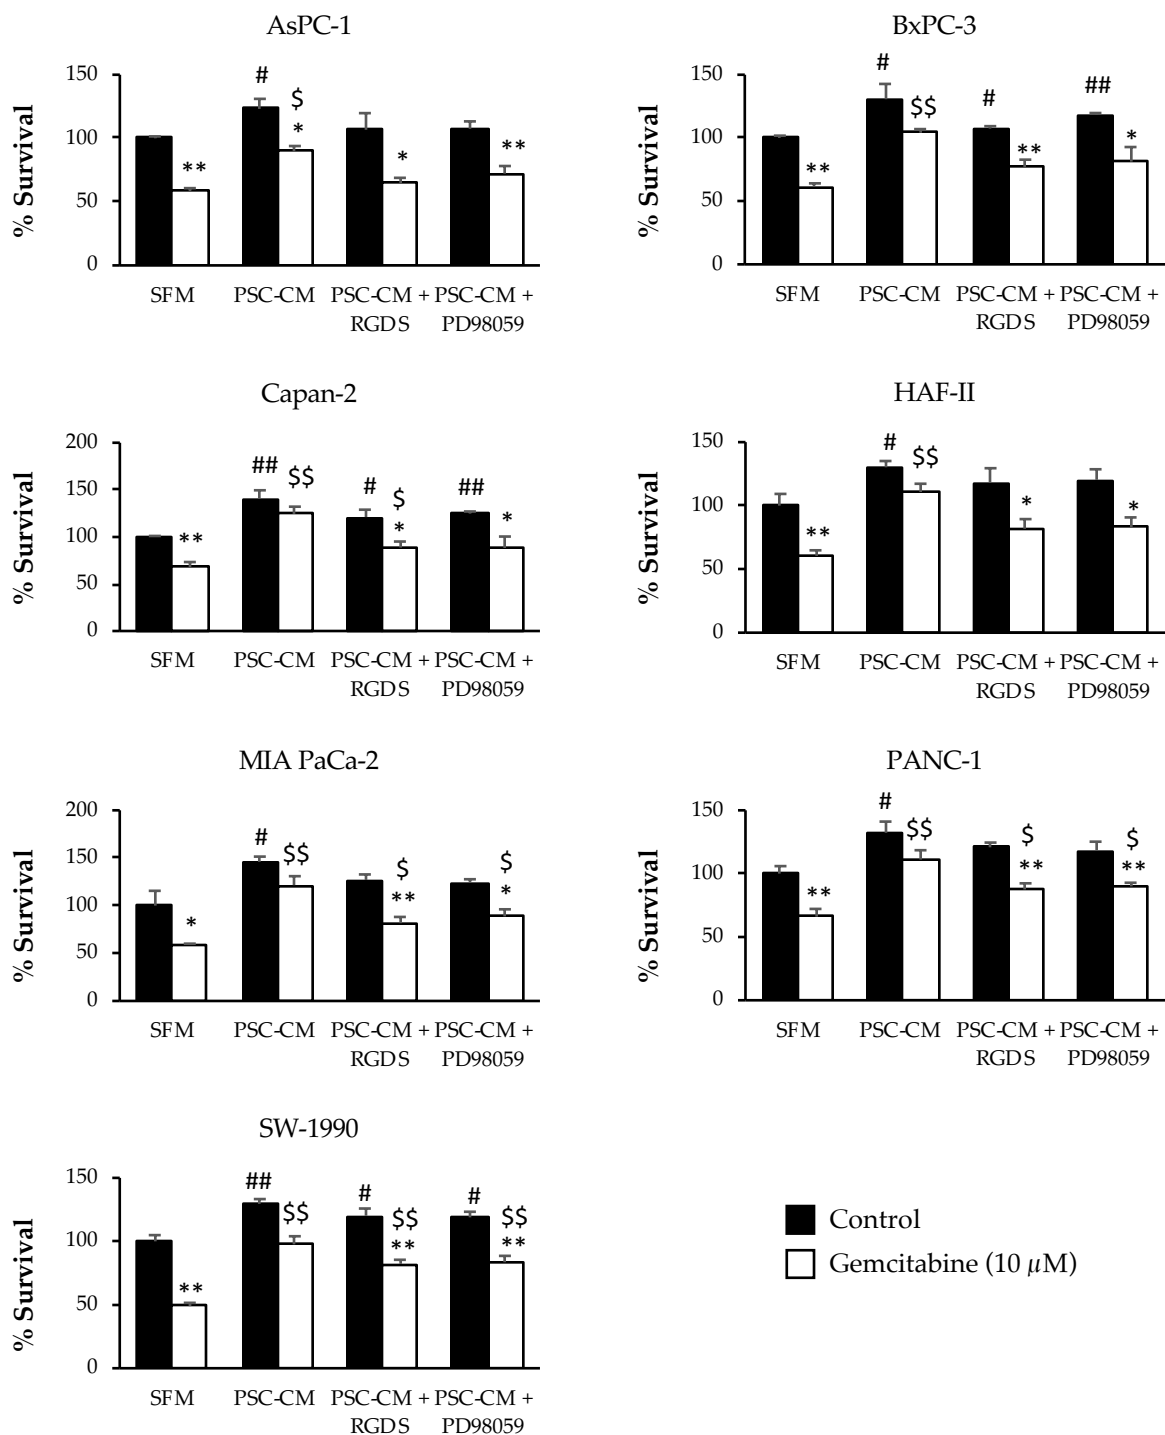

**Additional File 8\_Figure S5. Both FN-inhibitor (RGDS) and ERK-inhibitor (PD98059) block PSC-CM induced chemoresistance to gemcitabine.** PCCs seeded on 96-well plates were incubated with SFM or PSC-CM for 24 hours and/or RGDS (20 μM) or PD98059 (20 μM) for 4 hours prior to incubation with gemcitabine (10 μM) for 48 hours. Cell viability was determined using the MTT assay. Data are the mean ± SEM of triplicate determinations. \*p<0.05, \*\*p<0.01 for control vs gemcitabine; #p<0.05, ##p<0.01 and \$p<0.05, \$\$p<0.01 for SFM vs PSC-CM/RGDS/ PD98059 in control and gemcitabine, respectively. FN, fibronectin; PSC, pancreatic stellate cell; PSC-CM, PSC-conditioned medium; SFM, serum-free DMEM.
